# Supplementary material for: A quantitative model of the phytochrome-PIF light signalling initiating chloroplast development
Source: PubMed Central journal article supplement (PMC5655028; doi:10.1038/s41598-017-13473-2), 2017-10-24
Supplement: 41598_2017_13473_MOESM1_ESM.pdf [file 41598_2017_13473_MOESM1_ESM.pdf]

# Supplementary information: A quantitative model of the phytochrome-PIF light signalling initiating chloroplast development

Carole Dubreuil<sup>1</sup>, Yan Ji<sup>1</sup>, Åsa Strand<sup>1</sup>, and Andreas Grönlund<sup>1,a</sup>

<sup>1</sup> Umeå Plant Science Centre, Department of Plant Physiology, Umeå University, SE-90187 Umeå, Sweden

<sup>a</sup> andreas.gronlund@umu.se

## Supplementary figures

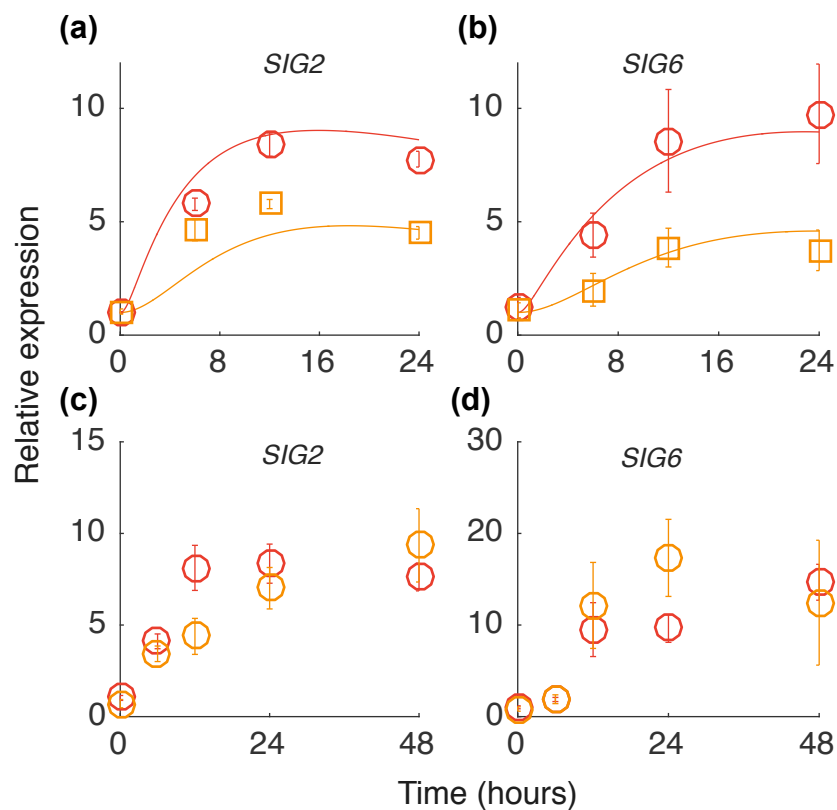

**Supplementary Figure S1. Mutant and sucrose expression profiles.** Expression after light induction of SIG2 (a) and SIG6 (b) in WT (red circle symbols) and *phyB* mutant (orange square symbols). Model data WT (red lines) and where PhyB levels are reduced with a factor 1/4 (orange lines). For SIG2 the mRNA half-life were set to 3 hours and for SIG6 6 hours. In (c) and (d) expression after light induction using 1% sucrose (red) and 0% sucrose (orange). 5-day old dark grown seedlings were exposed to light and sampled for RNA-extraction.

## Supplementary tables

### Supplementary Table S1

#### MEME-FIMO analysis 3 kb upstream of ATG

##### G-box

##### Distance from 3 kb upstream

|            | <b>Motif</b> | <b>Sequence Name</b> | <b>Strand</b> | <b>Start</b> | <b>End</b> | <b>p-value</b> | <b>Matched Sequence</b> |
|------------|--------------|----------------------|---------------|--------------|------------|----------------|-------------------------|
| pTAC3/PAP1 | 1            | AT3G04260            | +             | 429          | 434        | 0.000195       | CACGTG                  |
| pTAC3/PAP1 | 1            | AT3G04260            | +             | 2887         | 2892       | 0.000195       | CACGTG                  |
| pTAC2/PAP2 | 1            | AT1G74850            | +             | 1556         | 1561       | 0.000195       | CACGTG                  |
| pTAC2/PAP2 | 1            | AT1G74850            | +             | 2728         | 2733       | 0.000195       | CACGTG                  |
| MurE/PAP11 | 1            | AT1G63680            | +             | 1457         | 1462       | 0.000195       | CACGTG                  |
| PRIN2      | 1            | AT1G10522            | +             | 2502         | 2507       | 0.000195       | CACGTG                  |
| PRIN2      | 1            | AT1G10522            | -             | 2502         | 2507       | 0.000195       | CACGTG                  |
| SIG4       | 1            | AT5G13730            | +             | 1713         | 1718       | 0.000195       | CACGTG                  |
| SIG4       | 1            | AT5G13730            | +             | 2518         | 2523       | 0.000195       | CACGTG                  |
| SIG5       | 1            | AT5G24120            | +             | 1201         | 1206       | 0.000195       | CACGTG                  |

**Supplementary Table S2**

**MEME-FIMO analysis 3 kb upstream of ATG**

| PBE-box     | Motif | Sequence Name | Strand | Distance from 3 kb upstream |      | p-value  | Matched Sequence |
|-------------|-------|---------------|--------|-----------------------------|------|----------|------------------|
|             |       |               |        | Start                       | End  |          |                  |
| pTAC3/PAP1  | 1     | AT3G04260     | +      | 2550                        | 2555 | 0.000237 | CACATG           |
| pTAC3/PAP1  | 1     | AT3G04260     | +      | 2660                        | 2665 | 0.000237 | CACATG           |
| pTAC3/PAP1  | 1     | AT3G04260     | +      | 2898                        | 2903 | 0.000237 | CACATG           |
| pTAC10/PAP3 | 1     | AT3G48500     | -      | 2253                        | 2258 | 0.000237 | CACATG           |
| pTAC10/PAP3 | 1     | AT3G48500     | -      | 2618                        | 2623 | 0.000237 | CACATG           |
| pTAC10/PAP3 | 1     | AT3G48500     | -      | 2706                        | 2711 | 0.000237 | CACATG           |
| pTAC10/PAP3 | 1     | AT3G48500     | +      | 1369                        | 1374 | 0.000237 | CACATG           |
| pTAC12/PAP5 | 1     | AT2G34640     | -      | 1281                        | 1286 | 0.000237 | CACATG           |
| pTAC12/PAP5 | 1     | AT2G34640     | +      | 645                         | 650  | 0.000237 | CACATG           |
| pTAC12/PAP5 | 1     | AT2G34640     | +      | 1222                        | 1227 | 0.000237 | CACATG           |
| pTAC12/PAP5 | 1     | AT2G34640     | +      | 2335                        | 2340 | 0.000237 | CACATG           |
| FLN1/PAP6   | 1     | AT1G69200     | -      | 573                         | 578  | 0.000237 | CACATG           |
| FLN1/PAP6   | 1     | AT1G69200     | +      | 1398                        | 1403 | 0.000237 | CACATG           |
| FLN2        | 1     | AT3G54090     | -      | 1427                        | 1432 | 0.000237 | CACATG           |
| MurE/PAP11  | 1     | AT1G63680     | -      | 272                         | 277  | 0.000237 | CACATG           |
| MurE/PAP11  | 1     | AT1G63680     | -      | 320                         | 325  | 0.000237 | CACATG           |
| MurE/PAP11  | 1     | AT1G63680     | -      | 1446                        | 1451 | 0.000237 | CACATG           |
| MurE/PAP11  | 1     | AT1G63680     | -      | 1585                        | 1590 | 0.000237 | CACATG           |
| MurE/PAP11  | 1     | AT1G63680     | +      | 67                          | 72   | 0.000237 | CACATG           |
| PRIN2       | 1     | AT1G10522     | -      | 1500                        | 1505 | 0.000237 | CACATG           |
| PRIN2       | 1     | AT1G10522     | +      | 557                         | 562  | 0.000237 | CACATG           |
| SIG1        | 1     | AT1G64860     | +      | 4                           | 9    | 0.000237 | CACATG           |
| SIG2        | 1     | AT1G08540     | +      | 1570                        | 1575 | 0.000237 | CACATG           |
| SIG3        | 1     | AT3G53920     | -      | 1348                        | 1353 | 0.000237 | CACATG           |
| SIG3        | 1     | AT3G53920     | +      | 1346                        | 1351 | 0.000237 | CACATG           |
| SIG3        | 1     | AT3G53920     | +      | 2127                        | 2132 | 0.000237 | CACATG           |
| SIG4        | 1     | AT5G13730     | -      | 2576                        | 2581 | 0.000237 | CACATG           |
| SIG4        | 1     | AT5G13730     | +      | 664                         | 669  | 0.000237 | CACATG           |
| SIG4        | 1     | AT5G13730     | +      | 1377                        | 1382 | 0.000237 | CACATG           |
| SIG4        | 1     | AT5G13730     | +      | 1571                        | 1576 | 0.000237 | CACATG           |
| SIG5        | 1     | AT5G24120     | +      | 2181                        | 2186 | 0.000237 | CACATG           |
| SIG6        | 1     | AT2G36990     | +      | 265                         | 270  | 0.000237 | CACATG           |

Supplementary Table S3  
MEME-FIMO analysis 3 kb upstream of ATG

| PBE-box core  |           | Distance from 3 kb upstream |           | p-value | q-value | Matched Sequence |         |
|---------------|-----------|-----------------------------|-----------|---------|---------|------------------|---------|
| Sequence Name | Strand    | Start                       | End       |         |         |                  |         |
| FSD3/PAP4     | AT5G23310 | -                           | 690       | 695     | 0.00298 | 0.951            | AACATG  |
|               |           | -                           | 1351      | 1356    | 0.00298 | 0.951            | AACATG  |
|               |           | -                           | 1566      | 1571    | 0.00298 | 0.951            | AACATG  |
|               |           | +                           | 575       | 580     | 0.00298 | 0.951            | AACATG  |
|               |           | +                           | 688       | 693     | 0.00298 | 0.951            | AACATG  |
|               |           | -                           | 1074      | 1079    | 0.00456 | 0.951            | CACATT  |
|               |           | -                           | 2347      | 2352    | 0.00456 | 0.951            | CACATT  |
|               |           | +                           | 259       | 264     | 0.00346 | 0.951            | GACATG  |
|               |           | pTAC14/PAP7                 | AT4G20130 | +       | 2057    | 2062             | 0,00298 |
| +             | 1471      |                             |           | 1476    | 0,00369 | 0,951            | CACATC  |
| +             | 1476      |                             |           | 1481    | 0,00369 | 0,951            | CACATC  |
| -             | 1541      |                             |           | 1546    | 0,00456 | 0,951            | CACATT  |
| +             | 625       |                             |           | 630     | 0,00456 | 0,951            | CACATT  |
| +             | 1607      |                             |           | 1612    | 0,00456 | 0,951            | CACATT  |
| +             | 1699      |                             |           | 1704    | 0,00456 | 0,951            | CACATT  |
| +             | 2358      |                             |           | 2363    | 0,00456 | 0,951            | CACATT  |
| -             | 2557      |                             |           | 2562    | 0,00346 | 0,951            | GACATG  |
| -             | 1678      |                             |           | 1683    | 0,00456 | 0,951            | TACATG  |
| +             | 2531      |                             |           | 2536    | 0,00456 | 0,951            | TACATG  |
| pTAC6/PAP8    | AT1G21600 |                             |           | -       | 1385    | 1390             | 0.00298 |
|               |           | +                           | 1265      | 1270    | 0.00298 | 0.951            | AACATG  |
|               |           | -                           | 2038      | 2043    | 0.00298 | 0.951            | CACATA  |
|               |           | +                           | 1183      | 1188    | 0.00298 | 0.951            | CACATA  |
|               |           | -                           | 1630      | 1635    | 0.00369 | 0.951            | CACATC  |
|               |           | +                           | 649       | 654     | 0.00369 | 0.951            | CACATC  |
|               |           | +                           | 1345      | 1350    | 0.00369 | 0.951            | CACATC  |
|               |           | -                           | 1678      | 1683    | 0.00456 | 0.951            | CACATT  |
|               |           | +                           | 114       | 119     | 0.00456 | 0.951            | CACATT  |
|               |           | +                           | 178       | 183     | 0.00456 | 0.951            | CACATT  |
|               |           | +                           | 2086      | 2091    | 0.00456 | 0.951            | CACATT  |
|               |           | +                           | 1250      | 1255    | 0.00346 | 0.951            | GACATG  |
|               |           | FSD2/PAP9                   | AT5G51100 | +       | 456     | 461              | 0.00298 |
| +             | 913       |                             |           | 918     | 0.00298 | 0.951            | AACATG  |
| -             | 8         |                             |           | 13      | 0.00298 | 0.951            | CACATA  |
| -             | 368       |                             |           | 373     | 0.00298 | 0.951            | CACATA  |
| +             | 2150      |                             |           | 2155    | 0.00298 | 0.951            | CACATA  |
| +             | 2671      |                             |           | 2676    | 0.00298 | 0.951            | CACATA  |
| -             | 1464      |                             |           | 1469    | 0.00369 | 0.951            | CACATC  |
| +             | 1200      |                             |           | 1205    | 0.00456 | 0.951            | CACATT  |
| +             | 2628      |                             |           | 2633    | 0.00456 | 0.951            | CACATT  |
| -             | 404       |                             |           | 409     | 0.00346 | 0.951            | GACATG  |
| -             | 458       |                             |           | 463     | 0.00346 | 0.951            | GACATG  |
| +             | 1000      |                             |           | 1005    | 0.00346 | 0.951            | GACATG  |
| -             | 2745      |                             |           | 2750    | 0.00456 | 0.951            | TACATG  |
| +             | 402       |                             |           | 407     | 0.00456 | 0.951            | TACATG  |
| TrxZ/PAP10    | AT3G06730 | -                           | 518       | 523     | 0.00298 | 0.951            | AACATG  |
|               |           | +                           | 1042      | 1047    | 0.00298 | 0.951            | AACATG  |
|               |           | +                           | 1314      | 1319    | 0.00298 | 0.951            | AACATG  |
|               |           | +                           | 2332      | 2337    | 0.00298 | 0.951            | AACATG  |
|               |           | -                           | 1157      | 1162    | 0.00298 | 0.951            | CACATA  |
|               |           | -                           | 325       | 330     | 0.00369 | 0.951            | CACATC  |
|               |           | +                           | 736       | 741     | 0.00456 | 0.951            | CACATT  |
|               |           | +                           | 910       | 915     | 0.00456 | 0.951            | CACATT  |
|               |           | -                           | 723       | 728     | 0.00346 | 0.951            | GACATG  |
|               |           | -                           | 1044      | 1049    | 0.00346 | 0.951            | GACATG  |
|               |           | +                           | 2041      | 2046    | 0.00346 | 0.951            | GACATG  |
| pTAC7/PAP12   | AT5G24314 | -                           | 60        | 65      | 0.00298 | 0.951            | AACATG  |
|               |           | +                           | 2297      | 2302    | 0.00298 | 0.951            | AACATG  |
|               |           | -                           | 512       | 517     | 0.00298 | 0.951            | CACATA  |
|               |           | -                           | 1664      | 1669    | 0.00298 | 0.951            | CACATA  |
|               |           | -                           | 181       | 186     | 0.00369 | 0.951            | CACATC  |
|               |           | -                           | 531       | 536     | 0.00369 | 0.951            | CACATC  |
|               |           | +                           | 1210      | 1215    | 0.00369 | 0.951            | CACATC  |
|               |           | -                           | 1992      | 1997    | 0.00456 | 0.951            | CACATT  |
|               |           | +                           | 58        | 63      | 0.00456 | 0.951            | TACATG  |
|               |           | +                           | 544       | 549     | 0.00456 | 0.951            | TACATG  |
